# Supplementary material for: Measurement report: Assessing the impacts of emission uncertainty on aerosol optical properties and radiative forcing from biomass burning in peninsular Southeast Asia
Source: Copernicus journal article supplement (doi:10.5194/acp-24-367-2024), 2024-01-11
Supplement: Supplementary file 1 [file acp-24-367-2024-supplement.pdf]

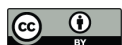

*Supplement of*

**Measurement report: Assessing the impacts of emission uncertainty on aerosol optical properties and radiative forcing from biomass burning in peninsular Southeast Asia**

**Yinbao Jin et al.**

*Correspondence to:* Yiming Liu (liuym88@mail.sysu.edu.cn) and Qi Fan (eesfq@mail.sysu.edu.cn)

The copyright of individual parts of the supplement might differ from the article licence.

# Supplement

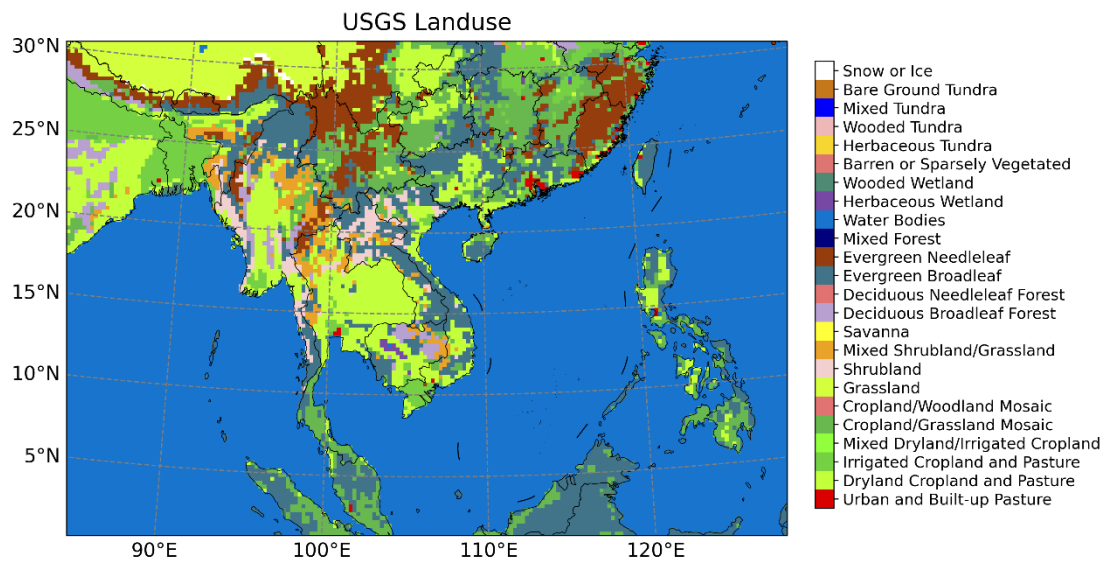

Figure S1. WRF-Chem uses land use classification data from 24 USGS classifications.

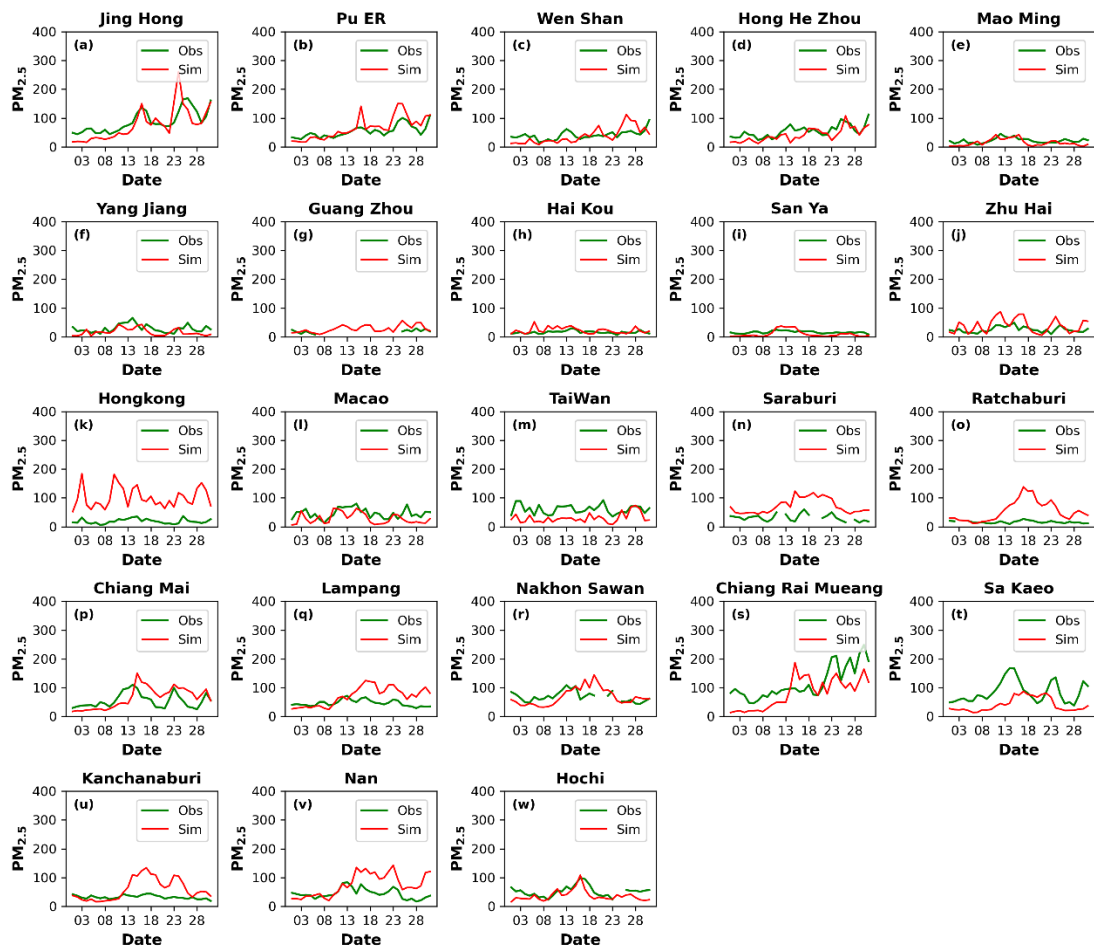

Figure S2. Time series of the observed (green lines) and simulated (red lines) daily average of  $PM_{2.5}$  concentrations from WRF-Chem with FINN 1.5 in the 23 cities in Table S6 during March 2019.

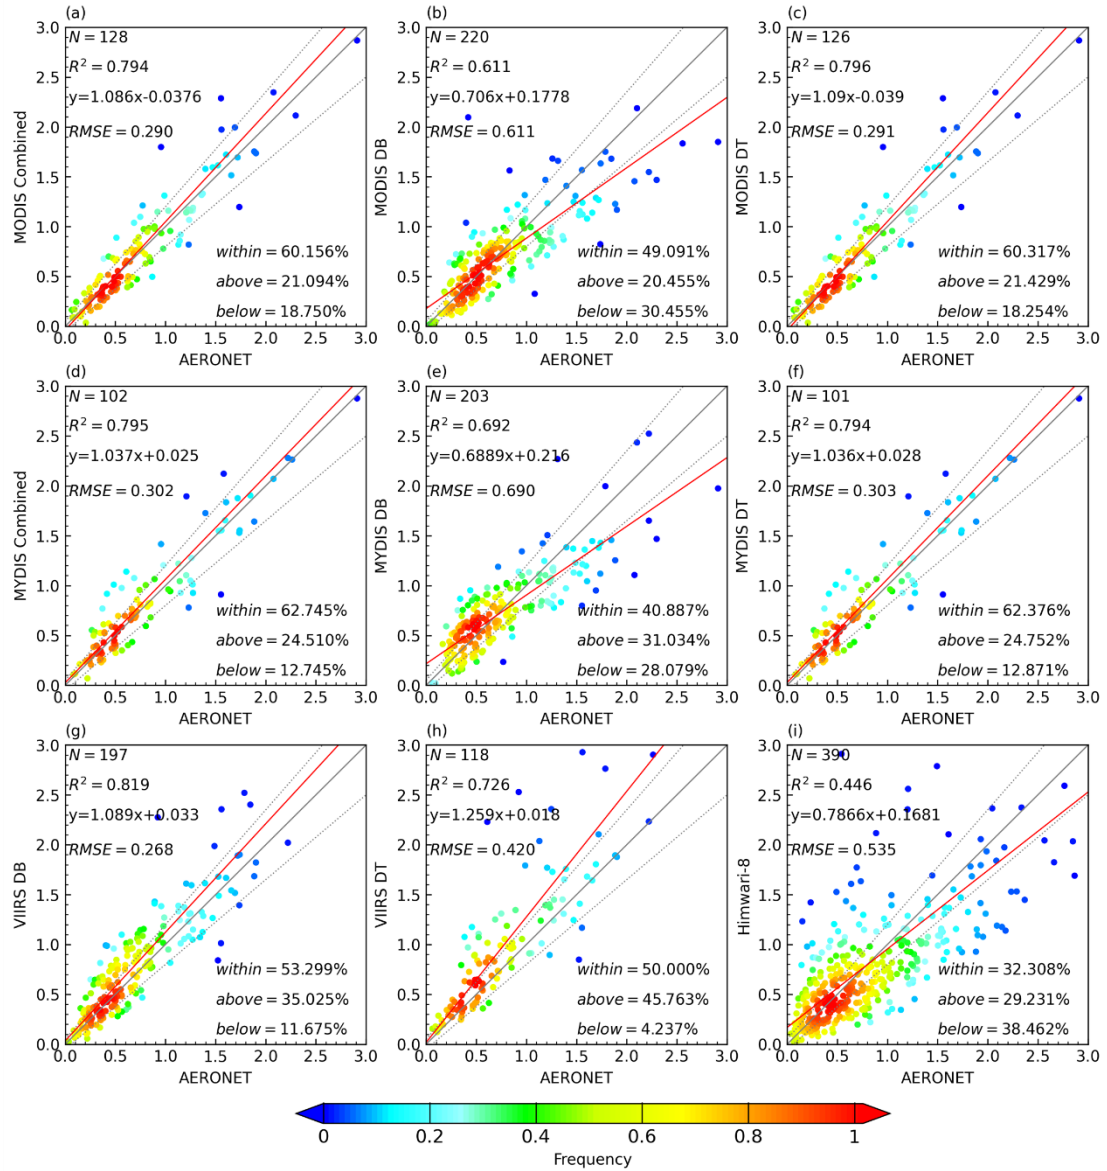

Figure S3. Satellite-AERONET linear regression, where (a)-(h) denote MODIS combined, MODIS DB, MODIS DT, MYDIS combined, MYDIS DB, MYDIS DT, VIIRS DB, VIIRS DT different satellite inversion AOD (550 nm) products compared with AERONET, (i) is Himawari-8 AOD (500 nm) vs. AERONET. The number of samples ( $N$ ),  $R^2$  correlation coefficient squared, and linear regression function and RMSE are also labeled in the upper left corner of each figure, and the lower right corner characterizes the expected values.

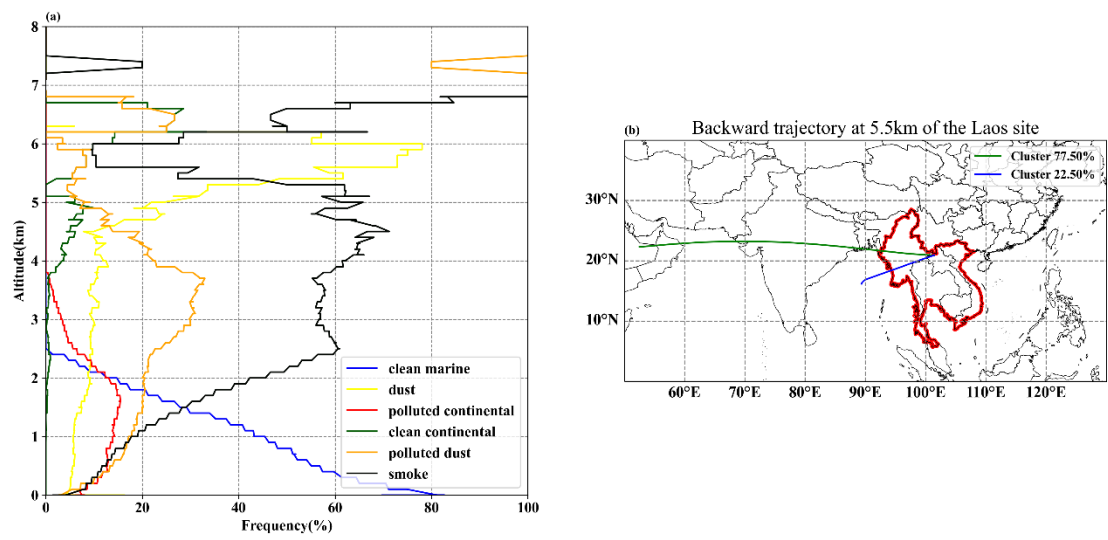

**Figure. S4. (a) The frequency distribution of six aerosol types within an 8 km altitude over the PSEA region in March 2019 (the different colors represent the six aerosol types). (b) 48-hour mean backward trajectory air mass (5500 m) at the Laos site (20.93,101.41) in March 2019, where the red boundary is the PSEA region.**

**Table S1. Emission factors (g kg<sup>-1</sup>) for species emitted from different types of biomass burning in GFED.**

| Species                                                             | Sava  | Borf  | Temf  | Defo  | Peat  | Agri  |
|---------------------------------------------------------------------|-------|-------|-------|-------|-------|-------|
| CO                                                                  | 63    | 127   | 88    | 93    | 210   | 102   |
| NO <sub>x</sub>                                                     | 3.9   | 0.9   | 1.92  | 2.55  | 1     | 3.11  |
| SO <sub>2</sub>                                                     | 0.48  | 1.1   | 1.1   | 0.4   | 0.4   | 0.4   |
| BIGALK                                                              | 0.055 | 0.349 | 0.225 | 0.072 | 0.072 | 0.34  |
| BIGENE                                                              | 0.133 | 0.385 | 0.369 | 0.267 | 0.267 | 0.333 |
| C <sub>2</sub> H <sub>4</sub>                                       | 0.82  | 1.42  | 1.17  | 1.06  | 2.57  | 1.46  |
| C <sub>2</sub> H <sub>5</sub> OH                                    | 0.024 | 0.055 | 0.1   | 0.037 | 0.037 | 0.035 |
| C <sub>2</sub> H <sub>6</sub>                                       | 0.66  | 1.79  | 0.63  | 0.71  | 0.71  | 0.91  |
| C <sub>3</sub> H <sub>8</sub>                                       | 0.1   | 0.44  | 0.22  | 0.126 | 0.126 | 0.28  |
| C <sub>3</sub> H <sub>6</sub>                                       | 0.79  | 1.13  | 0.61  | 0.64  | 3.05  | 0.68  |
| CH <sub>2</sub> O                                                   | 0.73  | 1.86  | 2.09  | 1.73  | 1.4   | 2.08  |
| CH <sub>3</sub> CHO                                                 | 0.84  | 0.81  | 1.21  | 2.26  | 1.16  | 1.8   |
| CH <sub>3</sub> COCH <sub>3</sub> (C <sub>3</sub> H <sub>6</sub> O) | 0.47  | 1.59  | 0.76  | 0.63  | 0.91  | 0.71  |
| CH <sub>3</sub> OH                                                  | 1.18  | 2.82  | 1.74  | 2.43  | 8.46  | 3.29  |
| MEK                                                                 | 0.181 | 0.22  | 0.13  | 0.5   | 0.5   | 0.9   |
| TOLUENE                                                             | 0.27  | 1.626 | 0.54  | 0.697 | 4.36  | 0.451 |
| NH <sub>3</sub>                                                     | 0.52  | 2.72  | 0.84  | 1.33  | 1.33  | 2.17  |
| NO <sub>2</sub>                                                     | 2.92  | 0.67  | 1.44  | 1.91  | 0.75  | 2.33  |
| Open/BIGALD(C <sub>5</sub> H <sub>6</sub> O <sub>2</sub> )          | 0.02  | 0.01  | 0.01  | 0.01  | 0     | 0.01  |
| C <sub>10</sub> H <sub>16</sub>                                     | 0.081 | 2.003 | 2.003 | 0.15  | 0.15  | 0.005 |
| CH <sub>3</sub> COOH                                                | 3.55  | 4.41  | 2.13  | 3.05  | 8.97  | 5.59  |
| CRESOL                                                              | 0.44  | 0.85  | 0.07  | 0.17  | 0     | 0.6   |
| GLYALD(HOCH <sub>2</sub> CHO)                                       | 0.25  | 0.86  | 0.86  | 0.74  | 0.74  | 0.71  |
| Mgly/CH <sub>3</sub> COCHO                                          | 0.73  | 0.73  | 0.73  | 0.73  | 0.73  | 0.73  |
| GLY                                                                 | 0.33  | 0.59  | 0.54  | 0.5   | 1.3   | 0.24  |
| ACETOL/HYAC                                                         | 1.01  | 0.77  | 8.03  | 0.55  | 0.64  | 0     |
| ISOP(C <sub>5</sub> H <sub>8</sub> )                                | 0.039 | 0.15  | 0.099 | 0.13  | 1.38  | 0.38  |
| MACR                                                                | 0     | 0     | 0     | 0.08  | 0     | 0     |
| MVK                                                                 | 0     | 0     | 0     | 0.2   | 0     | 0     |
| OC                                                                  | 2.62  | 9.6   | 9.6   | 4.71  | 6.02  | 2.3   |
| BC                                                                  | 0.37  | 0.5   | 0.5   | 0.52  | 0.04  | 0.75  |
| PM <sub>10</sub>                                                    | 7.2   | 18.4  | 16.97 | 18.5  | 0     | 7.02  |
| PM <sub>2.5</sub>                                                   | 7.17  | 15.3  | 12.9  | 9.1   | 9.1   | 6.26  |

Note: Sava: Savanna, grassland, and shrubland fires; Borf: Boreal forest fires; Temf: Temperate forest fires; Defo: Tropical deforestation & degradation; Peat: Peat fires; Agri: Agricultural waste burning. Compared to the FINNs scheme, the missing compounds and aerosols were added based on the methodology of Akagi et al. (2011) and Heil A. (2020).

**Table S2. Emission factors (g kg<sup>-1</sup>) for species emitted from different types of biomass burning in FINN1.5.**

| Species                           | Savanna | Tropical | Temperate | Agriculture | Boreal | Shrublands |
|-----------------------------------|---------|----------|-----------|-------------|--------|------------|
| CO                                | 59      | 92       | 102       | 111         | 118    | 68         |
| NO                                | 0.38    | 0.74     | 0.26      | 0.09        | 0.70   | 0.74       |
| SO <sub>2</sub>                   | 0.48    | 0.45     | 1         | 0.4         | 1      | 0.68       |
| BIGALK                            | 0.02    | 0.13     | 0.11      | 0.09        | 0.16   | 0.42       |
| BIGENE                            | 0.45    | 0.52     | 0.22      | 0.37        | 0.35   | 0.63       |
| C <sub>2</sub> H <sub>4</sub>     | 2.27    | 1.38     | 1.11      | 1.08        | 1.62   | 2.30       |
| C <sub>2</sub> H <sub>5</sub> OH  | 0.02    | 0.01     | 0.01      | 0.01        | 0.01   | 0.02       |
| C <sub>2</sub> H <sub>6</sub>     | 0.82    | 0.82     | 0.29      | 0.43        | 1.63   | 1.01       |
| C <sub>3</sub> H <sub>8</sub>     | 0.18    | 0.10     | 0.10      | 0.08        | 0.13   | 0.37       |
| C <sub>3</sub> H <sub>6</sub>     | 0.43    | 0.56     | 0.26      | 0.38        | 0.76   | 0.77       |
| CH <sub>2</sub> O                 | 2.12    | 2.08     | 1.33      | 1.84        | 1.46   | 2.23       |
| CH <sub>3</sub> CHO               | 1.03    | 1.27     | 0.38      | 3.05        | 0.67   | 0.96       |
| CH <sub>3</sub> COCH <sub>3</sub> | 0.22    | 0.39     | 0.20      | 0.83        | 0.20   | 0.71       |
| CH <sub>3</sub> OH                | 1.92    | 2.60     | 1.51      | 2.11        | 2.50   | 2.49       |
| MEK                               | 1.31    | 0.85     | 0.41      | 0.79        | 1.64   | 1.16       |
| TOLUENE                           | 1.16    | 2.06     | 0.61      | 1.07        | 1.30   | 1.30       |
| NH <sub>3</sub>                   | 0.49    | 0.76     | 1.5       | 2.3         | 3.5    | 1.2        |
| NO <sub>2</sub>                   | 3.2     | 3.6      | 2.7       | 3.9         | 3      | 1.4        |
| Open/BIGALD                       | 0.02    | 0.01     | 0.01      | 0.01        | 0.01   | 0.02       |
| C <sub>10</sub> H <sub>16</sub>   | 0.01    | 0.04     | 0.03      | 0.00        | 0.04   | 0.01       |
| CH <sub>3</sub> COOH              | 2.08    | 1.87     | 0.53      | 2.19        | 1.80   | 1.24       |
| CRESOL                            | 0.44    | 0.17     | 0.07      | 0.60        | 0.85   | 0.00       |
| GLYALD                            | 0.5     | 0.79     | 0.28      | 1.68        | 0.25   | 1.39       |
| Mgly/CH <sub>3</sub> COCHO        | 0.81    | 0.37     | 0.17      | 0.19        | 0.28   | 0.86       |
| GLY                               | 0.81    | 0.37     | 0.17      | 0.19        | 0.28   | 0.86       |
| ACETOL/HYAC                       | 1.01    | 0.55     | 8.03      | 0.00        | 0.77   | 0.00       |
| ISOP                              | 0.05    | 0.07     | 0.03      | 0.60        | 0.14   | 0.03       |
| MACR                              | 0.0     | 0.08     | 0.0       | 0.0         | 0.0    | 0.0        |
| MVK                               | 0.0     | 0.20     | 0.0       | 0.0         | 0.0    | 0.0        |
| OC                                | 2.6     | 4.7      | 9.2       | 3.3         | 7.8    | 6.6        |
| BC                                | 0.37    | 0.52     | 0.56      | 0.69        | 0.2    | 0.5        |
| PM <sub>2.5</sub>                 | 5.4     | 9.7      | 13        | 5.8         | 13     | 9.3        |

**Table S3. Emission factors (g kg<sup>-1</sup>) for species emitted from different types of biomass burning in FINN2.5.**

| Species                           | Savanna | Tropical | Temperate | Agriculture | Boreal | Shrublands |       |
|-----------------------------------|---------|----------|-----------|-------------|--------|------------|-------|
| CO                                | 63      | 93       | 122       | 91          | 111    | 67         |       |
| NO                                | 2.16    | 0.9      | 0.95      | 1.18        | 0.83   | 0.77       |       |
| SO <sub>2</sub>                   | 0.9     | 0.4      | 1.1       | 0.4         | 1      | 0.68       |       |
| BIGALK                            | 0.156   | 0.219    | 0.415     | 0.246       | 1.821  | 0.644      |       |
| BIGENE                            | 1.467   | 0.662    | 1.393     | 0.674       | 0.627  | 1.274      |       |
| C <sub>2</sub> H <sub>4</sub>     | 1.218   | 1.505    | 1.930     | 1.412       | 1.407  | 2.886      |       |
| C <sub>2</sub> H <sub>5</sub> OH  | 0.00    | 0.00     | 0.066     | 0.0         | 0.023  | 0.055      |       |
| C <sub>2</sub> H <sub>6</sub>     | 0.859   | 0.939    | 0.611     | 0.673       | 1.168  | 0.641      |       |
| C <sub>3</sub> H <sub>8</sub>     | 0.09    | 0.114    | 0.149     | 0.142       | 0.194  | 0.561      |       |
| C <sub>3</sub> H <sub>6</sub>     | 0.647   | 0.603    | 0.487     | 0.457       | 0.499  | 0.557      |       |
| CH <sub>2</sub> O                 | 1.532   | 2.299    | 2.181     | 1.716       | 1.361  | 2.285      |       |
| CH <sub>3</sub> CHO               | 1.037   | 1.404    | 0.758     | 0.929       | 0.416  | 0.792      |       |
| CH <sub>3</sub> COCH <sub>3</sub> | 0.201   | 0.433    | 0.297     | 0.162       | 0.242  | 0.242      |       |
| CH <sub>3</sub> OH                | 1.451   | 3.031    | 1.744     | 2.328       | 1.608  | 1.650      |       |
| MEK                               | 0.37    | 0.666    | 0.274     | 0.387       | 0.104  | 0.286      |       |
| TOLUENE                           | 0.457   | 0.769    | 0.605     | 0.375       | 1.327  | 0.531      |       |
| NH <sub>3</sub>                   | 0.56    | 1.3      | 2.47      | 2.12        | 1.8    | 1.2        |       |
| NO <sub>2</sub>                   | 3.22    | 3.6      | 2.34      | 2.99        | 0.63   | 2.58       |       |
| Open/BAZLD                        | 0.791   | 0.12     | 0.298     | 0.325       | 0.166  | 0.272      |       |
| C <sub>10</sub> H <sub>16</sub>   | APIN    | 0.009    | 0.0       | 0.261       | 0.01   | 0.259      | 0.053 |
|                                   | BPIN    | 0.0      | 0.0       | 0.008       | 0.0    | 0.209      | 0.004 |
| CH <sub>3</sub> COOH              | 2.371   | 2.029    | 1.292     | 2.349       | 1.36   | 1.353      |       |
| CRESOL                            | 0.059   | 0.0      | 0.059     | 0.074       | 0.04   | 0.058      |       |
| GLYALD                            | 0.390   | 1.886    | 0.210     | 0.800       | 0.233  | 0.128      |       |
| MGLY(CH <sub>3</sub> COCHO)       | 0.347   | 0.0      | 0.135     | 0.171       | 0.09   | 0.094      |       |
| GLY                               | 0.347   | 0.0      | 0.135     | 0.171       | 0.09   | 0.094      |       |
| ACETOL/ HYAC                      | 0.309   | 0.609    | 0.223     | 1.548       | 0.149  | 0.118      |       |
| ISOP                              | 0.069   | 0.029    | 0.129     | 0.062       | 0.085  | 0.138      |       |
| MACR                              | 0.0     | 0.222    | 0.113     | 0.0         | 0.024  | 0.147      |       |
| MVK                               | 0.317   | 0.222    | 0.247     | 0.193       | 0.087  | 0.301      |       |
| OC                                | 2.6     | 4.7      | 7.6       | 2.66        | 7.8    | 3.7        |       |
| BC                                | 0.37    | 0.52     | 0.56      | 0.51        | 0.2    | 1.31       |       |
| PM <sub>10</sub>                  | 7.2     | 18.5     | 16.97     | 7.02        | 18.4   | 11.4       |       |
| PM <sub>2.5</sub>                 | 7.17    | 9.9      | 15        | 6.43        | 18.4   | 7.1        |       |



**Table S4. Emission factors (g kg<sup>-1</sup>) for species emitted from different types of biomass burning in GFAS.**

| Species                                                             | Savanna | Tropical | Temperate | Agriculture |
|---------------------------------------------------------------------|---------|----------|-----------|-------------|
| CO                                                                  | 61      | 101      | 106       | 92          |
| NO <sub>x</sub>                                                     | 2.1     | 2.3      | 3.4       | 2.3         |
| SO <sub>2</sub>                                                     | 0.37    | 0.71     | 1.0       | 0.37        |
| BIGALK                                                              | 0.13    | 0.17     | 0.29      | 0.41        |
| BIGENE                                                              | 0.32    | 0.51     | 0.47      | 0.28        |
| C <sub>2</sub> H <sub>4</sub>                                       | 0.84    | 1.5      | 1.2       | 1.3         |
| C <sub>2</sub> H <sub>5</sub> OH                                    | 0.018   | 0.018    | 0.018     | 0.018       |
| C <sub>2</sub> H <sub>6</sub>                                       | 0.32    | 1.1      | 0.72      | 1.2         |
| C <sub>3</sub> H <sub>8</sub>                                       | 0.087   | 0.54     | 0.27      | 0.16        |
| C <sub>3</sub> H <sub>6</sub>                                       | 0.34    | 0.76     | 0.57      | 0.57        |
| CH <sub>2</sub> O                                                   | 1.06    | 2.2      | 2.2       | 2.1         |
| CH <sub>3</sub> CHO(C <sub>2</sub> H <sub>4</sub> O)                | 0.5     | 2.3      | 0.98      | 2.8         |
| CH <sub>3</sub> COCH <sub>3</sub> (C <sub>3</sub> H <sub>6</sub> O) | 0.48    | 0.63     | 0.67      | 1.1         |
| CH <sub>3</sub> OH                                                  | 1.5     | 3.0      | 1.9       | 3.7         |
| MEK                                                                 | 0.37    | 0.666    | 0.274     | 0.387       |
| TOLUENE(C <sub>7</sub> H <sub>8</sub> )                             | 0.18    | 0.24     | 0.40      | 0.18        |
| NH <sub>3</sub>                                                     | 0.90    | 0.93     | 1.6       | 1.6         |
| NO <sub>2</sub>                                                     | 1.575   | 1.725    | 2.55      | 1.725       |
| Open/BAZLD                                                          | 0.791   | 0.12     | 0.298     | 0.325       |
| C <sub>10</sub> H <sub>16</sub>                                     | 0.009   | 0.0      | 0.269     | 0.01        |
| CH <sub>3</sub> COOH                                                | 2.371   | 2.029    | 1.292     | 2.349       |
| CRESOL                                                              | 0.059   | 0.0      | 0.059     | 0.074       |
| GLYALD                                                              | 0.390   | 1.886    | 0.210     | 0.800       |
| MGLY(CH <sub>3</sub> COCHO)                                         | 0.347   | 0.0      | 0.135     | 0.171       |
| GLY(CH <sub>3</sub> COCHO)                                          | 0.347   | 0.0      | 0.135     | 0.171       |
| ACETOL/ HYAC                                                        | 0.309   | 0.609    | 0.223     | 1.548       |
| ISOP(C <sub>5</sub> H <sub>8</sub> )                                | 0.026   | 0.22     | 0.11      | 0.40        |
| MACR                                                                | 0.0     | 0.222    | 0.113     | 0.0         |
| MVK                                                                 | 0.317   | 0.222    | 0.247     | 0.193       |
| OC                                                                  | 3.2     | 4.3      | 9.1       | 4.2         |
| BC                                                                  | 0.46    | 0.57     | 0.56      | 0.42        |
| PM <sub>10</sub>                                                    | 7.2     | 18.5     | 16.97     | 7.02        |
| PM <sub>2.5</sub>                                                   | 4.9     | 9.1      | 13.8      | 8.3         |

Note: Compared to the FINNs scheme, the missing compounds and aerosols were added based on the methodology of Andreae and Merlet (2001;2019).

**Table S5. Missing data supplementation of FEER, QFED and IS4FIRES emission inventories based on the proportionality approach when WRF-Chem uses the MOZART-MOSAIC chemical mechanism.**

| Species           | FEER                  | QFED   | IS4FIRES |
|-------------------|-----------------------|--------|----------|
| CO                | NM                    | NM     | 9.18     |
| NO <sub>x</sub>   | NM                    | NM     | 0.29     |
| SO <sub>2</sub>   | NM                    | NM     | 0.05     |
| BIGALK            | 0.001                 | 0.001  | 0.001    |
| BIGENE            | 0.0041                | 0.0041 | 0.0041   |
| C2H4              | 0.0109                | 0.0109 | 0.093    |
| C2H5OH            | 0.0001                | 0.0001 | 0.0001   |
| C2H6              | NM                    | NM     | 0.2520   |
| C3H8              | NM                    | NM     | 0.0270   |
| C3H6              | NM                    | NM     | 0.059    |
| CH2O              | NM                    | NM     | 0.18     |
| CH3CHO            | 0.01                  | NM     | 0.14     |
| CH3COCH3          | NM                    | NM     | 0.07     |
| CH3OH             | NM                    | 0.0206 | 0.27     |
| MEK               | NM                    | NM     | 0.0067   |
| TOLUENE           | 0.0163                | 0.0163 | 0.0163   |
| NH <sub>3</sub>   | NM                    | NM     | 0.1      |
| NO <sub>2</sub>   | 0.75*NO <sub>x</sub>  | NM     | 0.08     |
| Open              | 0.0001                | 0.0001 | 0.0001   |
| C10H16            | 0.0003                | 0.0003 | 0.0003   |
| CH3COOH           | 0.0148                | 0.0148 | 0.0148   |
| CRESOL            | 0.0013                | 0.0013 | 0.0013   |
| GLYALD            | 0.0062                | 0.0062 | 0.0062   |
| MGLY              | 0.0029                | 0.0029 | 0.0029   |
| GLY               | 0.0029                | 0.0029 | 0.0029   |
| ACETOL            | 0.0044                | 0.0044 | 0.0044   |
| ISOP              | 0.0006                | 0.0006 | 0.03     |
| MACR              | 0.0006                | 0.0006 | 0.0006   |
| MVK               | 0.0016                | 0.0016 | 0.0016   |
| OC                | NM                    | NM     | 0.373    |
| BC                | NM                    | NM     | 0.054    |
| PM <sub>10</sub>  | 0.3*PM <sub>2.5</sub> | NM     | 0.3      |
| PM <sub>2.5</sub> | NM                    | NM     | NM       |

Notes: FEER, QFED emission inventories compared to the MOZART-MOSAIC mechanism missing data were supplemented through a combination of methodology of Jose et al. (2017), Andreae and Merlet (2001;2019) and the actual FINN data (March 2019 over PESA), where CO was used as a scaling factor. The IS4FIRES was supplemented with other substances through a combination of methodology of Jose et al. (2017), Andreae and Merlet (2001;2019), Baró et al. (2021), and Wiedinmyer et al. (2011) using PM<sub>2.5</sub> and CO as scaling factors. NO<sub>2</sub> using 0.75\*NO<sub>x</sub>. PM<sub>10</sub> using 0.3\*PM<sub>2.5</sub>. NM: No missing data.

**Table S6. Comparison statistics of meteorological variables simulated by WRF-Chem with FINN1.5 scheme and observation stations**

| Stations | Latitude(°N) | Longitude(°E) | variables | MB     | RMSE  | IOA  | R    |
|----------|--------------|---------------|-----------|--------|-------|------|------|
| 56964    | 22.47        | 100.58        | T(°C)     | -0.85  | 2.56  | 0.91 | 0.91 |
|          |              |               | RH (%)    | 5.17   | 17.67 | 0.83 | 0.7  |
|          |              |               | WS(m/s)   | 1.76   | 2.35  | 0.64 | 0.51 |
| 56969    | 21.28        | 101.35        | T(°C)     | -0.95  | 2.33  | 0.91 | 0.95 |
|          |              |               | RH (%)    | -13.58 | 20.69 | 0.82 | 0.82 |
|          |              |               | WS(m/s)   | 2.69   | 3.08  | 0.61 | 0.52 |
| 59431    | 22.38        | 108.13        | T(°C)     | 0.97   | 3.71  | 0.79 | 0.65 |
|          |              |               | RH (%)    | 0.78   | 9.51  | 0.8  | 0.62 |
|          |              |               | WS(m/s)   | 1.85   | 2.71  | 0.66 | 0.31 |
| 59644    | 21.27        | 109.08        | T(°C)     | 1.29   | 3.87  | 0.71 | 0.54 |
|          |              |               | RH (%)    | 7.62   | 11.2  | 0.72 | 0.4  |
|          |              |               | WS(m/s)   | 2.91   | 3.78  | 0.6  | 0.30 |
| 59758    | 20           | 110.15        | T(°C)     | -2.47  | 3.55  | 0.72 | 0.65 |
|          |              |               | RH (%)    | 11.33  | 15.09 | 0.74 | 0.66 |
|          |              |               | WS(m/s)   | 1.72   | 2.59  | 0.65 | 0.33 |
| 59287    | 23.13        | 113.29        | T(°C)     | 1.0    | 2.75  | 0.83 | 0.79 |
|          |              |               | RH (%)    | -8.01  | 15.03 | 0.77 | 0.65 |
|          |              |               | WS(m/s)   | 0.74   | 1.69  | 0.69 | 0.32 |
| 59663    | 21.86        | 111.96        | T(°C)     | -0.43  | 2.33  | 0.82 | 0.73 |
|          |              |               | RH (%)    | -0.18  | 8.16  | 0.81 | 0.65 |
|          |              |               | WS(m/s)   | 0.55   | 1.82  | 0.71 | 0.33 |
| 45011    | 22.15        | 113.59        | T(°C)     | 0.35   | 2.13  | 0.78 | 0.65 |
|          |              |               | RH (%)    | 0.82   | 7.64  | 0.79 | 0.65 |
|          |              |               | WS(m/s)   | 1.36   | 2.27  | 0.67 | 0.31 |
| 45007    | 22.3         | 113.91        | T(°C)     | -1.37  | 2.63  | 0.78 | 0.68 |
|          |              |               | RH (%)    | 7.66   | 12.62 | 0.74 | 0.66 |
|          |              |               | WS(m/s)   | -2.09  | 3.16  | 0.71 | 0.40 |
| 48855    | 16.04        | 108.19        | T(°C)     | -2.76  | 3.35  | 0.72 | 0.83 |
|          |              |               | RH (%)    | 2.4    | 9.67  | 0.81 | 0.74 |
|          |              |               | WS(m/s)   | 1.62   | 2.12  | 0.66 | 0.62 |
| 48930    | 19.87        | 102.16        | T(°C)     | -3.42  | 4.61  | 0.82 | 0.85 |
|          |              |               | RH (%)    | -7.51  | 18.09 | 0.82 | 0.72 |
|          |              |               | WS(m/s)   | 2.43   | 3.01  | 0.60 | 0.30 |
| 48327    | 18.76        | 98.96         | T(°C)     | -3.45  | 4.29  | 0.83 | 0.91 |
|          |              |               | RH (%)    | -2.45  | 13.63 | 0.82 | 0.74 |
|          |              |               | WS(m/s)   | 1.86   | 2.54  | 0.6  | 0.30 |
| 58968    | 25.03        | 121.51        | T(°C)     | -1.71  | 2.56  | 0.82 | 0.85 |
|          |              |               | RH (%)    | 8.06   | 13.95 | 0.76 | 0.61 |
|          |              |               | WS(m/s)   | 1.61   | 2.48  | 0.71 | 0.45 |

**Table S7. Comparison statistics of PM<sub>2.5</sub> simulated by WRF-Chem with FINN1.5 and air quality stations**

| Cites             | latitude(°N) | longitude(°E) | MB     | RMSE  | IOA  | R    |
|-------------------|--------------|---------------|--------|-------|------|------|
| Jing Hong         | 22           | 100.79        | -11.2  | 38.44 | 0.82 | 0.75 |
| Pu ER             | 22.76        | 100.98        | 11.92  | 26.32 | 0.8  | 0.84 |
| Wen Shan          | 23.35        | 104.25        | -2.77  | 24.97 | 0.7  | 0.41 |
| Hong He Zhou      | 23.36        | 103.37        | -13.24 | 23.04 | 0.77 | 0.62 |
| Mao Ming          | 21.46        | 111.02        | -6.69  | 12.35 | 0.72 | 0.51 |
| Yang Jiang        | 21.85        | 111.95        | -12.09 | 18.47 | 0.71 | 0.40 |
| Guang Zhou        | 23.55        | 113.58        | 9.65   | 16.06 | 0.67 | 0.50 |
| Hai Kou           | 20.05        | 110.32        | 6.53   | 11.34 | 0.66 | 0.45 |
| San Ya            | 18.24        | 109.5         | -5.55  | 10.62 | 0.67 | 0.69 |
| Zhu Hai           | 22.42        | 113.62        | 13.6   | 24.72 | 0.69 | 0.51 |
| Hongkong          | 22.32        | 114.25        | 82.21  | 88.43 | 0.54 | 0.43 |
| Macao             | 22.15        | 113.56        | -17.77 | 25.36 | 0.7  | 0.48 |
| TaiWan            | 25.013       | 121.511       | -30.37 | 35.23 | 0.66 | 0.38 |
| Saraburi          | 14.68        | 100.87        | 38.57  | 44.28 | 0.6  | 0.44 |
| Ratchaburi        | 13.52        | 99.81         | 40.18  | 52.03 | 0.54 | 0.57 |
| Chiang Mai        | 18.79        | 98.99         | 9.54   | 34.37 | 0.71 | 0.45 |
| Lampang           | 18.25        | 99.76         | 24.0   | 37.95 | 0.63 | 0.35 |
| Nakhon Sawan      | 15.68        | 100.11        | -2.5   | 26.31 | 0.73 | 0.45 |
| Chiang Rai Mueang | 19.9         | 99.82         | -33.81 | 56.82 | 0.74 | 0.64 |
| Sa Kaeo           | 13.69        | 102.51        | -43.66 | 56.3  | 0.68 | 0.36 |
| Kanchanaburi      | 14.02        | 99.53         | 26.98  | 43.48 | 0.58 | 0.47 |
| Nan               | 18.78        | 100.77        | 30.32  | 46.74 | 0.64 | 0.36 |
| Hochi             | 10.78        | 106.7         | -15.6  | 21.47 | 0.75 | 0.68 |

**Table S8. Statistical metrics for observation-model comparisons**

| Mathematical formulas                                                                             | Number |
|---------------------------------------------------------------------------------------------------|--------|
| $MB = \frac{1}{N} \sum_{i=1}^N (P_i - O_i)$                                                       | (1)    |
| $RMSE = \left[ \frac{1}{N} \sum_{i=1}^N (P_i - O_i)^2 \right]^{\frac{1}{2}}$                      | (2)    |
| $IOA = 1 - \frac{\sum_{i=1}^N (P_i - O_i)^2}{\sum_{i=1}^N ( P_i - \bar{P}  +  O_i - \bar{O} )^2}$ | (3)    |

Note: Where  $P_i$  and  $O_i$  are the predicted and observed T<sub>2</sub>, RH<sub>2</sub>, WS<sub>10</sub>, and PM<sub>2.5</sub>, respectively. N is the total number of the predictions used for comparisons, and  $\bar{P}$  and  $\bar{O}$  represents the average of the prediction and observation, respectively.

**Table S9. WRF-Chem AAOD at 500 nm vs. AERONET in HAAOD (97-110°E, 15-22.5°N) during the wildfire period, where HAAOD includes Laos, Doi Ang Khang, Fang, Nong Khai (all statistical days in 4 stations are greater than 10 days).**

| Stations         | Variables | BB emission inventories |         |            |                   |      |      |      |          |
|------------------|-----------|-------------------------|---------|------------|-------------------|------|------|------|----------|
|                  |           | GFED                    | FINN1.5 | FINN2.5MOS | FINN2.5<br>MOSVIS | GFAS | FEER | QFED | IS4FIRES |
| Laos             | R         | 0.77                    | 0.64    | 0.59       | 0.65              | 0.58 | 0.69 | 0.65 | 0.71     |
|                  | IOA       | 0.63                    | 0.67    | 0.71       | 0.71              | 0.63 | 0.65 | 0.63 | 0.64     |
| Doi Ang<br>Khang | R         | 0.07                    | 0.37    | 0.31       | 0.64              | NA   | 0.24 | NA   | 0.14     |
|                  | IOA       | 0.64                    | 0.7     | 0.69       | 0.75              | 0.64 | 0.65 | 0.64 | 0.63     |
| Fang             | R         | 0.59                    | 0.77    | 0.77       | 0.79              | 0.55 | 0.7  | 0.64 | 0.67     |
|                  | IOA       | 0.66                    | 0.7     | 0.76       | 0.74              | 0.65 | 0.66 | 0.66 | 0.67     |
| Nong Khai        | R         | 0.35                    | 0.37    | 0.52       | 0.74              | 0.31 | 0.35 | 0.34 | 0.43     |
|                  | IOA       | 0.7                     | 0.72    | 0.76       | 0.78              | 0.68 | 0.73 | 0.7  | 0.73     |

Notes: The blank data in the table are not counted because the statistical correlation coefficient is negative and the value is particularly small, which we consider an error.

NA: Not available.

## Reference

- Andreae, M. O.: Emission of trace gases and aerosols from biomass burning – an updated assessment, *Atmos. Chem. Phys.*, 19, 8523-8546, 10.5194/acp-19-8523-2019, 2019.
- Andreae, M. O. and Merlet, P.: Emission of trace gases and aerosols from biomass burning, 15, 955-966, <https://doi.org/10.1029/2000GB001382>, 2001.
- Baró, R., Maurer, C., Brioude, J., Arnold, D., and Hirtl, M.: The Environmental Effects of the April 2020 Wildfires and the Cs-137 Re-Suspension in the Chernobyl Exclusion Zone: A Multi-Hazard Threat, 12, 467, 2021.
- Heil A., B. I.: ESA CCI ECV Fire Disturbance: D5.1 Product Validation and Intercomparison Report, version 2.1, 2020.
- Jose, R. S., Pérez, J. L., González, R. M., Pecci, J., and Palacios, M.: Improving air quality modelling systems by using on-line wild land fire forecasting tools coupled into WRF/Chem simulations over Europe, *Urban Climate*, 22, 2-18, <https://doi.org/10.1016/j.uclim.2016.09.001>, 2017.
- Wiedinmyer, C., Akagi, S. K., Yokelson, R. J., Emmons, L. K., Al-Saadi, J. A., Orlando, J. J., and Soja, A. J.: The Fire INventory from NCAR (FINN): a high resolution global model to estimate the emissions from open burning, *Geosci. Model Dev.*, 4, 625-641, 10.5194/gmd-4-625-2011, 2011.
